# Supplementary material for: How to Measure Population Health: An Exploration Toward an Integration of Valid and Reliable Instruments
Source: PubMed Central journal article supplement — Popul Health Manag. 2018 Aug 1;21(4):323–30. doi: 10.1089/pop.2017.0097 (PMC6070127; doi:10.1089/pop.2017.0097), 2018-08-01
Supplement: Supp_Data.pdf [file Supp_Data.pdf]

## Supplementary Data

### Supplementary File S1. Description of Instrument Selection Process

The selection process for the used instruments consisted of 3 steps. First, input was gathered from national experts associated with the studied Population Management Initiatives regarding possible instruments for measuring the following concepts: quality of life, self-management, health literacy and psychological well-being. Second, the suggested instruments were aggregated and evaluated based on literature. For each instrument advantages, disadvantages, validity, time needed and target population were determined. Third, these results were evaluated by the authors of the report,<sup>1</sup> as well as experts of the studied nine pioneer sites. The final instruments were selected in consultation between both groups. The decisive factors were mostly the evidence of the supporting literature regarding validity and reliability, and the use by other Dutch institutions.

SUPPLEMENTARY TABLE S1.1. CONSIDERED INSTRUMENTS FOR INCLUSION IN QUESTIONNAIRE

| <i>Concept</i>                              | <i>Instrument</i>                                                                                                                                                                                      |
|---------------------------------------------|--------------------------------------------------------------------------------------------------------------------------------------------------------------------------------------------------------|
| Quality of life                             | Short Form 12<br>EuroQol 5 Dimensions<br>EuroQol 6 Dimensions<br>Social Production Function IL<br>World Health Organization 5<br>Promis Global Health                                                  |
| Self-management                             | Patient Assessment of Chronic Illness Care<br>Patient Assessment of Self-management Tasks<br>Patient Activation Measure 13<br>Self-Management Screening Questionnaire<br>Self-Management Ability Scale |
| Health literacy<br>Psychological well-being | Set of Brief Screening Questions<br>Kessler 10                                                                                                                                                         |

IL, instrument for the level of well-being.

**Supplementary File S2. Results of Multiple Imputed Datasets**

SUPPLEMENTARY TABLE S2.1. COMPARISON OF CHARACTERISTICS OF MISSING VALUE GROUPS

| Instrument Group                  | SF12         |             | PAM13        |            | K10          |            |
|-----------------------------------|--------------|-------------|--------------|------------|--------------|------------|
|                                   | No missing   | ≥1 missing  | No missing   | ≥1 missing | No missing   | ≥1 missing |
| N (%)                             | 2146 (68.8%) | 974 (31.2%) | 2886 (92.5%) | 234 (7.5%) | 2962 (94.9%) | 158 (5.1%) |
| Gender (% male)                   | 46.5         | 45.6        | 46.7         | 40.1       | 46.5         | 40.1       |
| Average age                       | 54.2         | 59.1**      | 55.4         | 59.0*      | 55.5         | 59.0*      |
| Education (% highly educated)     | 27.6         | 24.7        | 27.3         | 19.2*      | 26.9         | 22.8       |
| Origin (% native)                 | 87.2         | 85.6        | 86.7         | 86.7       | 86.7         | 87.7       |
| Employed (% paid job)             | 53.1         | 41.9**      | 50.0         | 43.5       | 49.9         | 43.4       |
| Disabled (% 100% disabled)        | 3.8          | 4.7         | 4.1          | 4.3        | 4.0          | 6.6        |
| Average BMI                       | 25.9         | 26.1        | 25.9         | 26.3       | 25.9         | 26.6       |
| Alcohol use (% alcohol consumers) | 59.4         | 58.4        | 59.6         | 51.7*      | 59.6         | 47.1*      |
| Smoking (% smokers)               | 18.0         | 16.8        | 17.6         | 18.6       | 17.6         | 18.4       |
| Health Literacy                   | 3.4*         | 3.3*        | 3.4          | 3.4        | 3.4          | 3.3        |

\*t-test (sig ≤0.05).

\*\*t-test (sig <0.001).

BMI, body mass index; K10, Kessler 10; PAM13, Patient Activation Measure 13; SF12, Short Form 12 version 2.

SUPPLEMENTARY TABLE S2.2. DESCRIPTIVES OF SUM SCORES OF THE SF12, PAM13 AND K10

|                    | SF12-PCS | SF12-MCS | PAM13 (MI based results) | K10 (MI based results) |
|--------------------|----------|----------|--------------------------|------------------------|
| Average            | NA       | NA       | 59.1                     | 16.6                   |
| Median             | NA       | NA       | 55.6                     | 14.0                   |
| Standard Deviation | NA       | NA       | 18.1                     | 7.0                    |
| Variance           | NA       | NA       | 329.2                    | 49.6                   |
| Minimum            | NA       | NA       | 0.0                      | 10.0                   |
| Maximum            | NA       | NA       | 100.0                    | 48.0                   |
| 25%                | NA       | NA       | 48.9                     | 11.0                   |
| 50%                | NA       | NA       | 55.6                     | 14.0                   |
| 75%                | NA       | NA       | 67.8                     | 19.0                   |

K10, Kessler 10; MCS, Mental Component Score; MI, multiple imputation; NA, not available; PAM13, Patient Activation Measure 13; PCS, Physical Component Score; SF12, Short Form 12 version 2.

SUPPLEMENTARY TABLE S2.3. VALIDITY AND RELIABILITY TEST RESULTS OF THE SF12, PAM13 AND K10

|                                                        | SF12 <sup>b</sup> | PAM13 (MI based results) | K10 (MI based results) |
|--------------------------------------------------------|-------------------|--------------------------|------------------------|
| Construct validity                                     |                   |                          |                        |
| Chi-squared                                            | NA                | 869.6**                  | 1295.6**               |
| NNFI                                                   | NA                | 0.839                    | 0.899                  |
| CFI                                                    | NA                | 0.876                    | 0.921                  |
| RMSEA                                                  | NA                | 0.099                    | 0.107                  |
| Discriminant validity                                  |                   |                          |                        |
| Mean difference between ≤75 and >75 years              | NA                | 2.0                      | -1.5*                  |
| Mean difference between non-highly and highly educated | NA                | -7.5**                   | -1.8**                 |
| Reliability                                            |                   |                          |                        |
| Cronbach's alpha                                       | 0.93–0.93         | 0.89–0.89                | 0.93–0.93              |
| Guttman's Lambda 6                                     | 0.94–0.95         | 0.90–0.91                | 0.93–0.93              |
| Split-half                                             | 0.93–0.93         | 0.88–0.89                | 0.92–0.92              |

CFI, Comparative Fit Index; K10, Kessler 10; MI, multiple imputation; NA, not available; NNFI, Non-Normed Fit Index; PAM13, Patient Activation Measure 13; RMSEA, Root Mean Squared Error of Approximation; SF12, Short Form 12 version 2.

SUPPLEMENTARY TABLE S2.4. CORRECTED ITEM-TOTAL  
CORRELATION OF THE SHORT FORM 12

| <i>Item</i> | <i>Question</i>                 | <i>Corrected<br/>item-total<br/>correlation</i> |
|-------------|---------------------------------|-------------------------------------------------|
| 1           | General health                  | 0.55–0.56                                       |
| 2           | Moderate activities             | 0.51–0.52                                       |
| 3           | Climb several flights of stairs | 0.50–0.51                                       |
| 4           | Accomplished less (physical)    | 0.59–0.60                                       |
| 5           | Limited in kind of work         | 0.57                                            |
| 6           | Accomplished less (emotional)   | 0.65–0.66                                       |
| 7           | Did work less careful           | 0.63–0.64                                       |
| 8           | Pain – interference             | 0.62–0.63                                       |
| 9           | Calm and peaceful               | 0.49–0.52                                       |
| 10          | Energy                          | 0.55–0.57                                       |
| 11          | Downhearted and blue            | 0.36–0.38                                       |
| 12          | Social limitations              | 0.52–0.53                                       |

SUPPLEMENTARY TABLE S2.6. CORRECTED ITEM-TOTAL  
CORRELATION OF THE PATIENT ACTIVATION MEASURE 13

| <i>Item</i> | <i>Question</i>                                   | <i>Corrected<br/>item-total<br/>correlation</i> |
|-------------|---------------------------------------------------|-------------------------------------------------|
| 1           | Own responsibility                                | 0.49                                            |
| 2           | Active role                                       | 0.54–0.55                                       |
| 3           | Confidence of own contribution                    | 0.60–0.61                                       |
| 4           | Knowledge of medication                           | 0.51                                            |
| 5           | Confident when to go see a physician              | 0.62                                            |
| 6           | Confident to tell physician worries               | 0.54–0.55                                       |
| 7           | Confident to perform medical<br>treatment at home | 0.61–0.62                                       |
| 8           | Understanding of health issues<br>and reasons     | 0.63–0.64                                       |
| 9           | Knowledge of possible treatments                  | 0.64–0.65                                       |
| 10          | Change in lifestyle                               | 0.57–0.58                                       |
| 11          | Understanding of what is preventable              | 0.67–0.68                                       |
| 12          | Confident to come up with solutions               | 0.63                                            |
| 13          | Change in lifestyle - stress                      | 0.58–0.59                                       |

SUPPLEMENTARY TABLE S2.5. CORRECTED ITEM-TOTAL  
CORRELATION OF THE KESSLER 10

| <i>Item</i> | <i>Question</i>                      | <i>Corrected<br/>item-total<br/>correlation</i> |
|-------------|--------------------------------------|-------------------------------------------------|
| 1           | Tired                                | 0.61–0.62                                       |
| 2           | Nervous                              | 0.69                                            |
| 3           | Nervous – rest                       | 0.74–0.75                                       |
| 4           | Hopeless                             | 0.78–0.79                                       |
| 5           | Restless                             | 0.74–0.75                                       |
| 6           | Restless – unable to sit still       | 0.66–0.67                                       |
| 7           | Somber/depressed                     | 0.78–0.79                                       |
| 8           | Too much effort                      | 0.74–0.75                                       |
| 9           | Unable to be cheered up              | 0.79–0.80                                       |
| 10          | Reprehensible, inferior or worthless | 0.70–0.71                                       |

**Supplementary File S3. Descriptives of Responses**

SUPPLEMENTARY TABLE S3.1. RESPONSE RATE OF SHORT FORM 12 (TOTAL N=3120)

| <i>Item</i> | <i>Question</i>                 | <i>N</i> | <i>Response rate (%)</i> | <i>Respondents with lowest score (%)</i> | <i>Respondents with highest score (%)</i> |
|-------------|---------------------------------|----------|--------------------------|------------------------------------------|-------------------------------------------|
| 1           | General health                  | 3094     | 99.2                     | 3.1                                      | 11.3                                      |
| 2           | Moderate activities             | 2957     | 94.8                     | 8.2                                      | 66.2                                      |
| 3           | Climb several flights of stairs | 2918     | 93.5                     | 7.2                                      | 66.1                                      |
| 4           | Accomplished less (physical)    | 2788     | 89.4                     | 4.9                                      | 33.5                                      |
| 5           | Limited in kind of work         | 2752     | 88.2                     | 4.6                                      | 36.9                                      |
| 6           | Accomplished less (emotional)   | 2754     | 88.3                     | 2.8                                      | 43.4                                      |
| 7           | Did work less careful           | 2713     | 87.0                     | 2.1                                      | 43.7                                      |
| 8           | Pain – interference             | 2971     | 95.2                     | 2.9                                      | 45.2                                      |
| 9           | Calm and peaceful               | 2938     | 94.2                     | 1.5                                      | 16.4                                      |
| 10          | Energy                          | 2933     | 94.0                     | 2.6                                      | 13.2                                      |
| 11          | Downhearted and blue            | 2942     | 94.3                     | 1.3                                      | 31.0                                      |
| 12          | Social limitations              | 3001     | 96.2                     | 2.4                                      | 45.4                                      |

SUPPLEMENTARY TABLE S3.2. RESPONSE RATE OF PATIENT ACTIVATION MEASURE 13 (TOTAL N=3120)

| <i>Item</i> | <i>Question</i>                                | <i>N</i> | <i>Response rate (%)</i> | <i>Respondents with lowest score (%)</i> | <i>Respondents with highest score (%)</i> | <i>% not applicable</i> |
|-------------|------------------------------------------------|----------|--------------------------|------------------------------------------|-------------------------------------------|-------------------------|
| 1           | Own responsibility                             | 3059     | 98.0                     | 3.0                                      | 37.5                                      | 2.4                     |
| 2           | Active role                                    | 3045     | 97.6                     | 1.7                                      | 28.4                                      | 12.3                    |
| 3           | Confidence of own contribution                 | 3040     | 97.4                     | 2.1                                      | 29.6                                      | 4.6                     |
| 4           | Knowledge of medication                        | 3049     | 97.7                     | 1.5                                      | 23.6                                      | 32.6                    |
| 5           | Confident when to go see a physician           | 3046     | 97.6                     | 1.3                                      | 35.8                                      | 2.4                     |
| 6           | Confident to tell physician worries            | 3051     | 97.8                     | 1.8                                      | 37.2                                      | 4.3                     |
| 7           | Confident to perform medical treatment at home | 3050     | 97.8                     | 1.4                                      | 28.5                                      | 18.2                    |
| 8           | Understanding of health issues and reasons     | 3052     | 97.8                     | 1.6                                      | 23.1                                      | 25.4                    |
| 9           | Knowledge of possible treatments               | 3043     | 97.5                     | 2.2                                      | 17.7                                      | 28.1                    |
| 10          | Change in lifestyle                            | 3046     | 97.6                     | 1.4                                      | 21.9                                      | 19.3                    |
| 11          | Understanding of what is preventable           | 3037     | 97.3                     | 1.9                                      | 23.2                                      | 6.9                     |
| 12          | Confident to come up with solutions            | 3045     | 97.6                     | 3.5                                      | 14.2                                      | 12.7                    |
| 13          | Change in lifestyle - stress                   | 3054     | 97.9                     | 2.8                                      | 20.5                                      | 9.0                     |

SUPPLEMENTARY TABLE S3.3. RESPONSE RATE OF KESSLER 10 (TOTAL N=3120)

| <i>Item</i> | <i>Question</i>                      | <i>N</i> | <i>Response rate (%)</i> | <i>Respondents with lowest score (%)</i> | <i>Respondents with highest score (%)</i> |
|-------------|--------------------------------------|----------|--------------------------|------------------------------------------|-------------------------------------------|
| 1           | Tired                                | 3068     | 98.3                     | 2.1                                      | 36.4                                      |
| 2           | Nervous                              | 3067     | 98.3                     | 0.7                                      | 40.1                                      |
| 3           | Nervous – rest                       | 3062     | 98.1                     | 0.4                                      | 66.1                                      |
| 4           | Hopeless                             | 3060     | 98.1                     | 0.8                                      | 71.6                                      |
| 5           | Restless                             | 3057     | 98.0                     | 0.6                                      | 43.2                                      |
| 6           | Restless – unable to sit still       | 3054     | 97.9                     | 0.4                                      | 69.5                                      |
| 7           | Somber/depressed                     | 3067     | 98.3                     | 0.7                                      | 59.3                                      |
| 8           | Too much effort                      | 3053     | 97.9                     | 2.3                                      | 45.6                                      |
| 9           | Unable to be cheered up              | 3060     | 98.1                     | 0.5                                      | 72.8                                      |
| 10          | Reprehensible, inferior or worthless | 3065     | 98.2                     | 0.9                                      | 70.0                                      |

Supplementary File S4. Boxplots of Studied Instruments

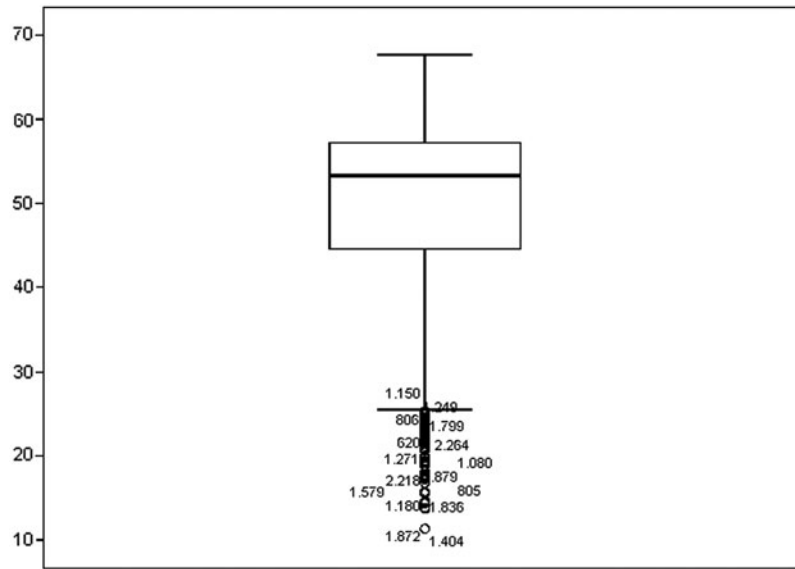

SUPPLEMENTARY FIG. S4.1. Boxplot of sumscores Short Form 12 - Physical Component Score

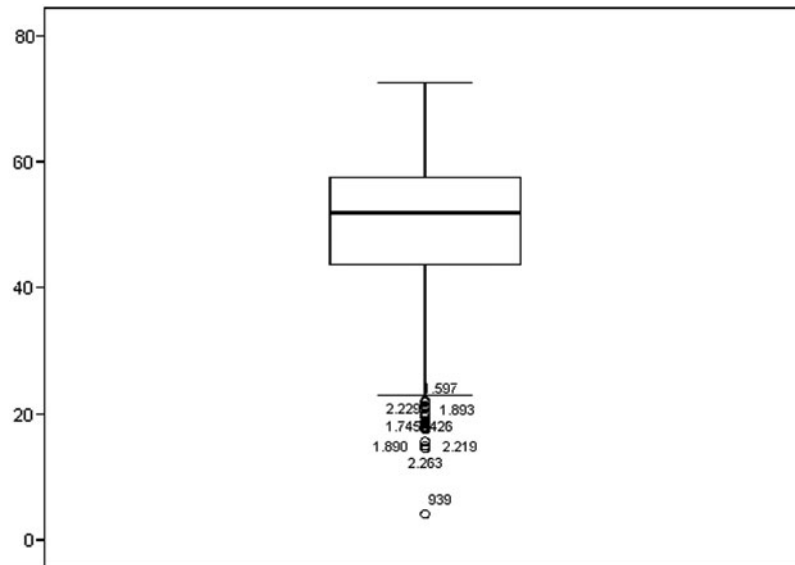

SUPPLEMENTARY FIG. S4.2. Boxplot of sumscores Short Form 12 - Mental Component Score

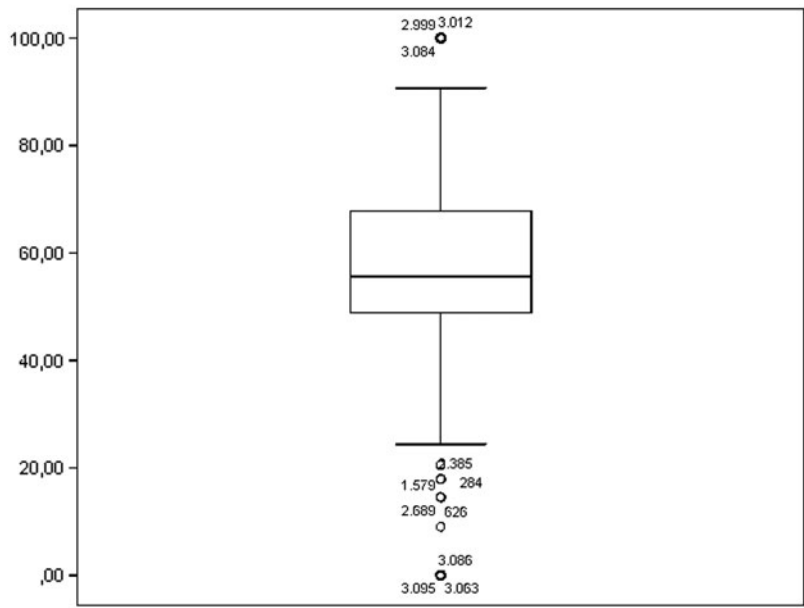

**SUPPLEMENTARY FIG. S4.3.** Boxplot of sumscores Patient Activation Measure 13

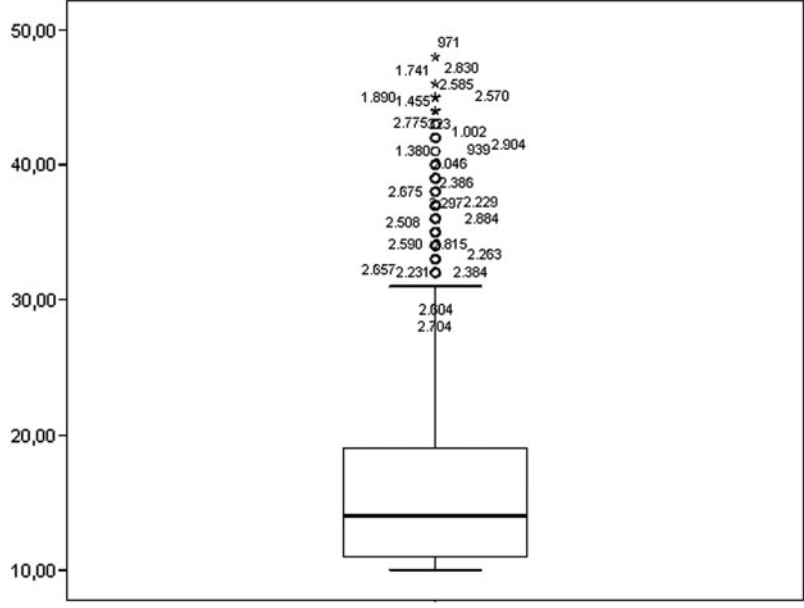

**SUPPLEMENTARY FIG. S4.4.** Boxplot of sumscores Kessler 10

**Supplementary File S5. Results of Exploratory Factor Analyses**

SUPPLEMENTARY TABLE S5.1. FACTOR LOADINGS OF EXPLORATORY FACTOR ANALYSES SHORT FORM 12

| <i>Item</i> | <i>Question</i>                 | <i>Factor</i> |          |
|-------------|---------------------------------|---------------|----------|
|             |                                 | <i>1</i>      | <i>2</i> |
| 1           | General health                  | -0.687        | 0.163    |
| 2           | Moderate activities             | 0.766         | -0.312   |
| 3           | Climb several flights of stairs | 0.723         | -0.281   |
| 4           | Accomplished less (physical)    | 0.889         | -0.233   |
| 5           | Limited in kind of work         | 0.880         | -0.290   |
| 6           | Accomplished less (emotional)   | 0.776         | 0.502    |
| 7           | Did work less careful           | 0.763         | 0.461    |
| 8           | Pain – interference             | -0.742        | 0.259    |
| 9           | Calm and peaceful               | -0.604        | -0.200   |
| 10          | Energy                          | -0.705        | -0.015   |
| 11          | Downhearted and blue            | 0.511         | 0.379    |
| 12          | Social limitations              | 0.775         | 0.091    |

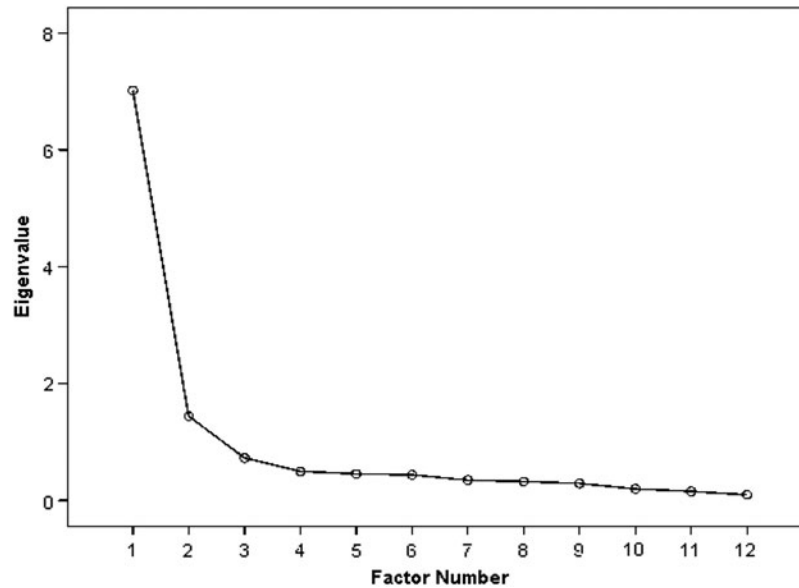

**SUPPLEMENTARY FIG. S5.1.** Screenplot of exploratory factor analyses Short Form 12

SUPPLEMENTARY TABLE S5.2. ROTATED FACTOR LOADINGS  
OF EXPLORATORY FACTOR ANALYSES SHORT FORM 12

| Item | Question                        | Factor |        |
|------|---------------------------------|--------|--------|
|      |                                 | 1      | 2      |
| 1    | General health                  | -0.637 | -0.303 |
| 2    | Moderate activities             | 0.792  | 0.236  |
| 3    | Climb several flights of stairs | 0.740  | 0.234  |
| 4    | Accomplished less (physical)    | 0.839  | 0.375  |
| 5    | Limited in kind of work         | 0.868  | 0.325  |
| 6    | Accomplished less (emotional)   | 0.291  | 0.878  |
| 7    | Did work less careful           | 0.307  | 0.837  |
| 8    | Pain – interference             | -0.741 | -0.262 |
| 9    | Calm and peaceful               | -0.346 | -0.534 |
| 10   | Energy                          | -0.540 | -0.453 |
| 11   | Downhearted and blue            | 0.161  | 0.615  |
| 12   | Social limitations              | 0.547  | 0.556  |

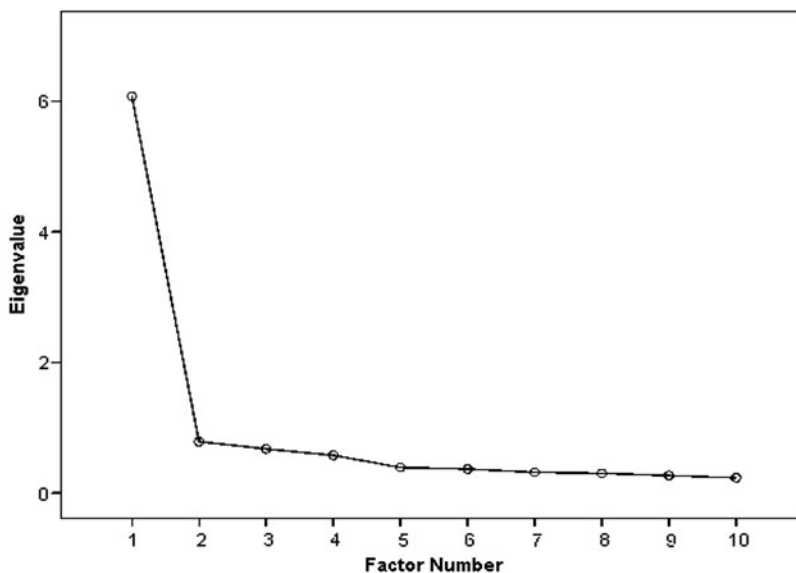

SUPPLEMENTARY FIG. S5.2. Screenplot of exploratory factor analyses Kessler 10



SUPPLEMENTARY TABLE S5.3. FACTOR LOADINGS  
OF EXPLORATORY FACTOR ANALYSES KESSLER 10

| <i>Item</i> | <i>Question</i>                      | <i>Factor</i><br>1 |
|-------------|--------------------------------------|--------------------|
| 1           | Tired                                | 0.626              |
| 2           | Nervous                              | 0.709              |
| 3           | Nervous – rest                       | 0.756              |
| 4           | Hopeless                             | 0.824              |
| 5           | Restless                             | 0.755              |
| 6           | Restless – unable to sit still       | 0.672              |
| 7           | Somber/depressed                     | 0.828              |
| 8           | Too much effort                      | 0.751              |
| 9           | Unable to be cheered up              | 0.832              |
| 10          | Reprehensible, inferior or worthless | 0.737              |

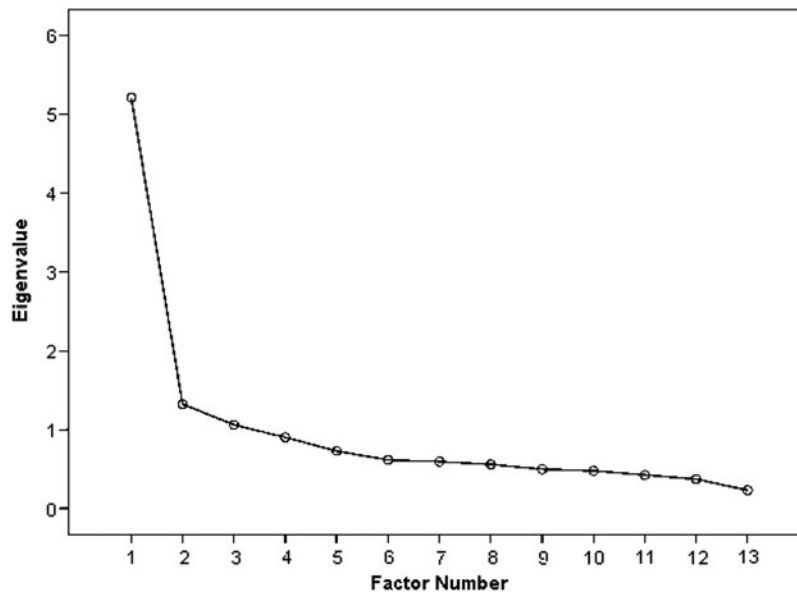

SUPPLEMENTARY FIG. S5.3. Screenplot of exploratory factor analyses Patient Activation Measure 13

SUPPLEMENTARY TABLE S5.4. FACTOR LOADINGS  
 OF EXPLORATORY FACTOR ANALYSES PATIENT  
 ACTIVATION MEASURE 13

| <i>Item</i> | <i>Question</i>                                | <i>Factor 1</i> |
|-------------|------------------------------------------------|-----------------|
| 1           | Own responsibility                             | 0.428           |
| 2           | Active role                                    | 0.415           |
| 3           | Confidence of own contribution                 | 0.542           |
| 4           | Knowledge of medication                        | 0.560           |
| 5           | Confident when to go see a physician           | 0.541           |
| 6           | Confident to tell physician worries            | 0.487           |
| 7           | Confident to perform medical treatment at home | 0.585           |
| 8           | Understanding of health issues and reasons     | 0.751           |
| 9           | Knowledge of possible treatments               | 0.756           |
| 10          | Change in lifestyle                            | 0.581           |
| 11          | Understanding of what is preventable           | 0.651           |
| 12          | Confident to come up with solutions            | 0.682           |
| 13          | Change in lifestyle - stress                   | 0.613           |

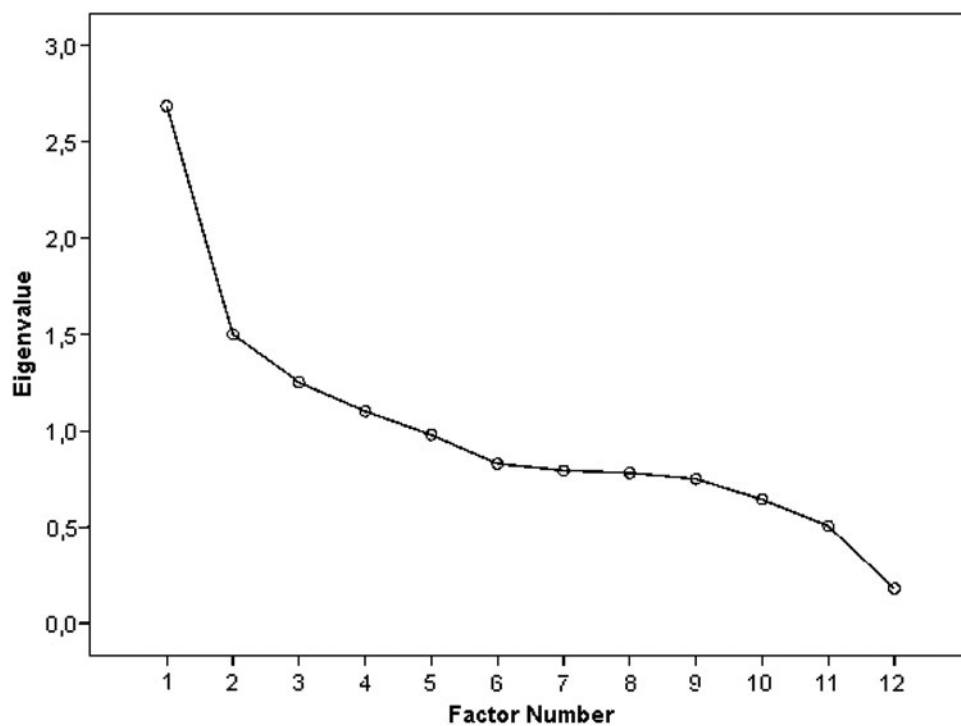

SUPPLEMENTARY FIG. S5.5. Screenplot overall exploratory factor analysis

SUPPLEMENTARY TABLE S5.5. STRUCTURE MATRIX OF OVERALL EXPLORATORY FACTOR ANALYSIS

|                 | <i>Factor</i> |          |          |          |
|-----------------|---------------|----------|----------|----------|
|                 | <i>1</i>      | <i>2</i> | <i>3</i> | <i>4</i> |
| Employed        | 0.041         | 0.377    | -0.011   | 0.119    |
| Disabled        | -0.205        | -0.378   | 0.014    | -0.124   |
| BMI             | 0.079         | -0.200   | -0.131   | -0.186   |
| Alcohol use     | 0.031         | 0.112    | 0.633    | 0.172    |
| Daily exercise  | 0.096         | 0.047    | 0.052    | 0.227    |
| Smoking status  | 0.061         | 0.061    | -0.339   | 0.022    |
| Health literacy | 0.176         | 0.254    | 0.092    | 0.384    |
| Care use        | -0.165        | -0.529   | -0.057   | -0.210   |
| PCS             | -0.054        | 0.859    | 0.036    | 0.348    |
| MCS             | 0.915         | 0.180    | -0.009   | 0.406    |
| PAM13 score     | 0.166         | 0.220    | -0.017   | 0.623    |
| K10 score       | -0.800        | -0.410   | -0.015   | -0.451   |

BMI, body mass index; K10, Kessler 10; MCS, Mental Component Score; PAM13, Patient Activation Measure 13; PCS, Physical Component Score.

SUPPLEMENTARY TABLE S5.6. STRUCTURE MATRIX OF OVERALL EXPLORATORY FACTOR ANALYSIS WITHOUT KESSLER 10

|                 | <i>Factor</i> |          |          |          |
|-----------------|---------------|----------|----------|----------|
|                 | <i>1</i>      | <i>2</i> | <i>3</i> | <i>4</i> |
| PCS             | -0.196        | 0.790    | 0.034    | 0.335    |
| MCS             | 0.936         | 0.222    | -0.007   | 0.442    |
| Alcohol use     | -0.002        | 0.107    | 0.613    | 0.174    |
| Smoking status  | 0.052         | 0.062    | -0.349   | 0.024    |
| Daily exercise  | 0.077         | 0.038    | 0.055    | 0.223    |
| Employment      | -0.023        | 0.409    | -0.015   | 0.123    |
| Disabled        | -0.119        | -0.393   | 0.018    | -0.130   |
| Care use        | -0.070        | -0.569   | -0.060   | -0.207   |
| PAM13 score     | 0.089         | 0.227    | -0.020   | 0.628    |
| Health Literacy | 0.094         | 0.257    | 0.090    | 0.386    |
| BMI             | 0.108         | -0.210   | -0.132   | -0.177   |

BMI, body mass index; MCS, Mental Component Score; PAM13, Patient Activation Measure 13; PCS, Physical Component Score.

SUPPLEMENTARY TABLE S5.7. ROTATED MATRIX OF OVERALL EXPLORATORY FACTOR ANALYSIS WITHOUT KESSLER 10

|                 | <i>Factor</i> |          |          |          |
|-----------------|---------------|----------|----------|----------|
|                 | <i>1</i>      | <i>2</i> | <i>3</i> | <i>4</i> |
| PCS             | -0.146        | 0.602    | -0.014   | 0.196    |
| MCS             | 0.989         | 0.138    | -0.036   | 0.279    |
| Alcohol use     | -0.043        | 0.023    | 0.556    | 0.096    |
| Smoking status  | 0.006         | 0.016    | -0.228   | -0.003   |
| Daily exercise  | -0.024        | -0.014   | 0.030    | 0.099    |
| Employment      | -0.014        | 0.127    | -0.023   | -0.009   |
| Disabled        | 0.002         | -0.118   | 0.022    | 0.035    |
| Care use        | 0.020         | -0.212   | -0.030   | 0.021    |
| PAM13 score     | -0.118        | -0.002   | -0.040   | 0.455    |
| Health Literacy | -0.047        | 0.040    | 0.050    | 0.160    |
| BMI             | 0.032         | -0.048   | -0.072   | -0.078   |

BMI, body mass index; MCS, Mental Component Score; PAM13, Patient Activation Measure 13; PCS, Physical Component Score.

SUPPLEMENTARY TABLE S5.8. PATTERN MATRIX OF OVERALL EXPLORATORY FACTOR ANALYSIS CONDUCTED AMONG PARTICIPANTS <65

|                 | <i>Factor</i> |                         |                  |                        |
|-----------------|---------------|-------------------------|------------------|------------------------|
|                 | <i>Mental</i> | <i>Physical ability</i> | <i>Lifestyle</i> | <i>Self-management</i> |
| Employed        | -0.067        | 0.431                   | 0.015            | -0.013                 |
| Disabled        | -0.133        | 0.521                   | 0.037            | 0.073                  |
| BMI             | 0.126         | 0.172                   | -0.091           | -0.152                 |
| Alcohol use     | 0.041         | -0.088                  | 0.571            | 0.043                  |
| Daily exercise  | 0.029         | 0.060                   | 0.011            | 0.174                  |
| Smoking status  | 0.011         | -0.087                  | -0.393           | 0.059                  |
| Health literacy | 0.064         | -0.102                  | 0.036            | 0.301                  |
| Care use        | -0.114        | 0.572                   | -0.056           | 0.039                  |
| SF12 PCS        | 0.247         | 0.803                   | 0.082            | -0.094                 |
| SF12 MCS        | 0.922         | -0.031                  | 0.026            | 0.170                  |
| PAM13 score     | 0.015         | -0.055                  | -0.115           | 0.615                  |
| K10 score       | 0.690         | -0.287                  | 0.008            | 0.175                  |

BMI, body mass index; K10, Kessler 10; MCS, Mental Component Score; PAM13, Patient Activation Measure 13; PCS, Physical Component Score; SF12, Short Form 12 version 2.

SUPPLEMENTARY TABLE S5.8. PATTERN MATRIX OF OVERALL EXPLORATORY FACTOR ANALYSIS CONDUCTED AMONG PARTICIPANTS ≥65

|                 | <i>Factor</i> |                         |                  |                        |
|-----------------|---------------|-------------------------|------------------|------------------------|
|                 | <i>Mental</i> | <i>Physical ability</i> | <i>Lifestyle</i> | <i>Self-management</i> |
| Employed        | -0.071        | -0.007                  | 0.086            | -0.071                 |
| Disabled        | -0.108        | 0.142                   | -0.028           | 0.054                  |
| BMI             | 0.053         | 0.025                   | -0.061           | -0.259                 |
| Alcohol use     | 0.117         | -0.061                  | 0.984            | 0.071                  |
| Daily exercise  | 0.177         | -0.064                  | 0.026            | 0.286                  |
| Smoking status  | -0.003        | -0.025                  | -0.226           | -0.029                 |
| Health literacy | 0.328         | -0.103                  | 0.080            | 0.232                  |
| Care use        | 0.035         | 0.301                   | 0.055            | -0.307                 |
| SF12 PCS        | 0.095         | 0.971                   | 0.052            | -0.163                 |
| SF12 MCS        | 0.798         | 0.112                   | -0.008           | 0.096                  |
| PAM13 score     | 0.219         | -0.015                  | -0.053           | 0.399                  |
| K10 score       | 0.965         | -0.175                  | 0.008            | -0.144                 |

BMI, body mass index; K10, Kessler 10; MCS, Mental Component Score; PAM13, Patient Activation Measure 13; PCS, Physical Component Score; SF12, Short Form 12 version 2.

**Supplementary File S6. Results of Convergent Validity Tests**

SUPPLEMENTARY TABLE S6.1. CORRECTED ITEM-TOTAL CORRELATION OF THE SHORT FORM 12

| <i>Item</i> | <i>Question</i>                 | <i>Corrected item-total correlation</i> |
|-------------|---------------------------------|-----------------------------------------|
| 1           | General health                  | 0.676                                   |
| 2           | Moderate activities             | 0.731                                   |
| 3           | Climb several flights of stairs | 0.691                                   |
| 4           | Accomplished less (physical)    | 0.825                                   |
| 5           | Limited in kind of work         | 0.808                                   |
| 6           | Accomplished less (emotional)   | 0.719                                   |
| 7           | Did work less careful           | 0.708                                   |
| 8           | Pain – interference             | 0.709                                   |
| 9           | Calm and peaceful               | 0.635                                   |
| 10          | Energy                          | 0.722                                   |
| 11          | Downhearted and blue            | 0.519                                   |
| 12          | Social limitations              | 0.780                                   |

SUPPLEMENTARY TABLE S6.3. CORRECTED ITEM-TOTAL CORRELATION OF THE PATIENT ACTIVATION MEASURE 13

| <i>Item</i> | <i>Question</i>                                | <i>Corrected item-total correlation</i> |
|-------------|------------------------------------------------|-----------------------------------------|
| 1           | Own responsibility                             | 0.463                                   |
| 2           | Active role                                    | 0.541                                   |
| 3           | Confidence of own contribution                 | 0.580                                   |
| 4           | Knowledge of medication                        | 0.519                                   |
| 5           | Confident when to go see a physician           | 0.622                                   |
| 6           | Confident to tell physician worries            | 0.540                                   |
| 7           | Confident to perform medical treatment at home | 0.619                                   |
| 8           | Understanding of health issues and reasons     | 0.649                                   |
| 9           | Knowledge of possible treatments               | 0.667                                   |
| 10          | Change in lifestyle                            | 0.561                                   |
| 11          | Understanding of what is preventable           | 0.665                                   |
| 12          | Confident to come up with solutions            | 0.627                                   |
| 13          | Change in lifestyle - stress                   | 0.577                                   |

**Reference**

1. Drewes HW, Heijink R, Struijs JN, Baan CA. Samen werken aan duurzame zorg. Landelijke monitor proeftuinen. Bilthoven, Netherlands: National Institute for Public Health and the Environment, 2015.

SUPPLEMENTARY TABLE S6.2. CORRECTED ITEM-TOTAL CORRELATION OF THE KESSLER 10

| <i>Item</i> | <i>Question</i>                      | <i>Corrected item-total correlation</i> |
|-------------|--------------------------------------|-----------------------------------------|
| 1           | Tired                                | 0.613                                   |
| 2           | Nervous                              | 0.687                                   |
| 3           | Nervous – rest                       | 0.732                                   |
| 4           | Hopeless                             | 0.778                                   |
| 5           | Restless                             | 0.736                                   |
| 6           | Restless – unable to sit still       | 0.645                                   |
| 7           | Somber/depressed                     | 0.776                                   |
| 8           | Too much effort                      | 0.737                                   |
| 9           | Unable to be cheered up              | 0.784                                   |
| 10          | Reprehensible, inferior or worthless | 0.693                                   |
